# Supplementary material for: Effects of various food ingredients on gall bladder emptying
Source: PubMed Central journal article supplement — Eur J Clin Nutr. 2013 Sep 18;67(11):1182–7. doi: 10.1038/ejcn.2013.168 (PMC3898429; doi:10.1038/ejcn.2013.168), 2013-09-18
Supplement: ejcn2013168x1.pdf [file ejcn2013168x1.pdf]

**Supplementary Table 1.** Characteristics of the 10 test products consumed by healthy volunteers in Study 1

|                                                          | 25 ml dairy emulsion | 25 ml dairy emulsion + 300 mg potato protease inhibitor | 67.5g yogurt drink | 67.5g yogurt drink + 3g protein | 67.5g yogurt drink + 80 mg curcumin | 250ml coffee | 250ml tea  | 250ml semi-skimmed milk | 20ml high-fat emulsion | 4ml high-fat emulsion |
|----------------------------------------------------------|----------------------|---------------------------------------------------------|--------------------|---------------------------------|-------------------------------------|--------------|------------|-------------------------|------------------------|-----------------------|
| Drink size ( <i>ml</i> )                                 | 25                   | 25                                                      | 67.5               | 67.5                            | 67.5                                | 250          | 250        | 250                     | 20                     | 4                     |
| Plant stanol ester ( <i>g</i> )                          | 3.41                 | 3.41                                                    | 3.41               | 3.41                            | 3.41                                | 0            | 0          | 0                       | 0                      | 0                     |
| Fat including stanol ( <i>g</i> )                        | 1.38                 | 1.38                                                    | 1.48               | 1.5                             | 1.48                                | 0            | 0          | 4.5                     | 10                     | 2                     |
| Protein ( <i>g</i> )                                     | 0.88                 | 0.93                                                    | 1.9                | 3.08                            | 1.9                                 | 0            | 0          | 9                       | 0                      | 0                     |
| Maximum % gallbladder volume change                      | 17±3**               | 19±4**                                                  | 11±3**             | 19±4**                          | 23±5*                               | 22±4*        | 18±6**     | 41±3                    | 42±7                   | 27±8                  |
| % gallbladder volume change at t=45 min                  | 8±4*                 | 12±5                                                    | -3±6**             | 9±5*                            | 17±4                                | 11±7         | 7±9*       | 32±3                    | 32±7                   | 19±10                 |
| AUC for gallbladder volumes ( <i>ml·min</i> )            | 1686±192*            | 1530±224                                                | 1363±154           | 1457±195                        | 1571±229*                           | 1508±192     | 1657±214** | 1204±113                | 1218±109               | 1256±173              |
| Time to maximum gallbladder volume change ( <i>min</i> ) | 36±8                 | 51±5                                                    | 45±7               | 35±6                            | 31±6*                               | 48±7         | 43±9       | 39±7                    | 60±2                   | 43±8                  |

Abbreviations: AUC, area under the curve. Values are mean±s.e.m., *n*=8. Dunnett's multiple comparisons test versus the 20 ml high fat emulsion \* *P*<0.05, \*\* *P*<0.01
