# Supplementary material for: Effects of various food ingredients on gall bladder emptying
Source: PubMed Central journal article supplement — Eur J Clin Nutr. 2013 Sep 18;67(11):1182–7. doi: 10.1038/ejcn.2013.168 (PMC3898429; doi:10.1038/ejcn.2013.168), 2013-09-18
Supplement: ejcn2013168x2.pdf [file ejcn2013168x2.pdf]

**Supplementary Table 2:** Characteristics of the 4 test products consumed by healthy volunteers in Study 2

|                                                 | Drink A   | Drink B  | Drink C  | Drink D   |
|-------------------------------------------------|-----------|----------|----------|-----------|
| Drink size (ml)                                 | 150       | 150      | 150      | 150       |
| Plant stanol ester (g)                          | 3.44      | 3.44     | 3.44     | 3.44      |
| Fat including stanol (g)                        | 1.5       | 3.5      | 6.5      | 10        |
| Protein (g)                                     | 9         | 9        | 9        | 9         |
| Maximum % gallbladder volume change             | 33±3      | 41±3     | 45±3**   | 47±4**    |
| % gallbladder volume change at t=45 min         | 26±3      | 34±3     | 37±4*    | 41±4**    |
| AUC for gallbladder volumes (ml·min)            | 1546±136  | 1376±118 | 1413±137 | 1230±98** |
| Time to maximum gallbladder volume change (min) | 41±4      | 46±4     | 52±3*    | 49±3      |
| Maximum plasma CCK (pMol/l)                     | 1.3±0.3   | 1.6±0.3  | 2.3±0.4§ | 2.2±0.3§  |
| Plasma CCK at t=45 min (pMol/l)                 | 0.16±0.07 | 0.4±0.1  | 0.8±0.2§ | 0.8±0.2§  |

Abbreviations: AUC, area under the curve; CCK cholecystokinin. Values are mean±s.e.m., n=21 (n=17 for CCK data). Dunnett's multiple comparisons test versus Drink A (low fat) \* P<0.05, \*\* P<0.01; Dunn's multiple comparison test versus Drink A (low fat) § P<0.05.
